# Supplementary material for: Streptococcal Arginine Deiminase Inhibits T Lymphocyte Differentiation In Vitro
Source: MDPI journal article supplement (doi:10.3390/microorganisms11102585), 2023-10-19
Supplement: s1 [file s1]

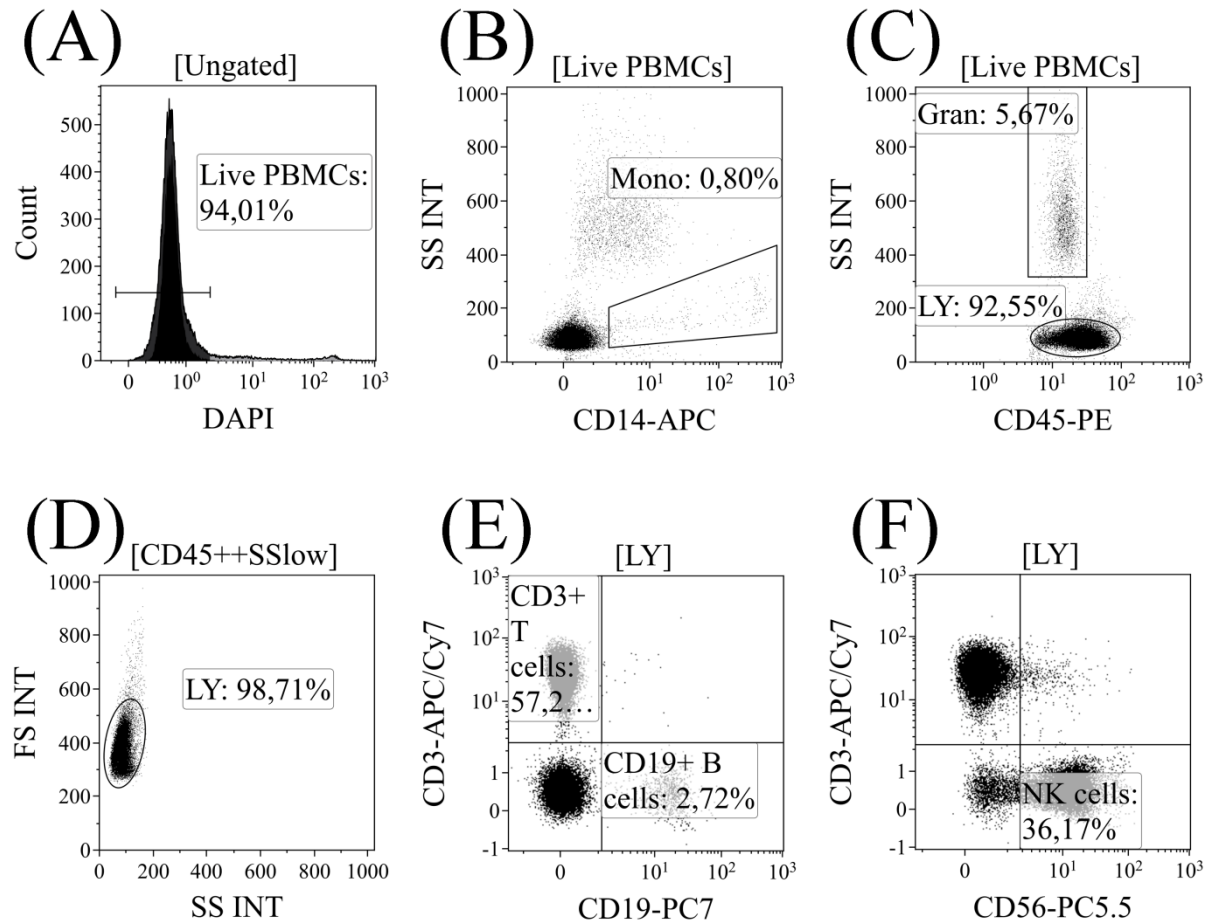

**Figure S1.** Flow cytometric analysis of PBMCs prior the *in vitro* experiments. Dot plot (A) live cell discrimination (DAPI solution (final concentration 1  $\mu\text{g/mL}$  (DAPI was manufactured by BioLegend Inc, San Diego, CA, USA, cat# 422801) was used to discriminate alive (DAPI negative) and dead (DAPI positive) cells); dot plot (B) monocytes were detected as CD14-positive cells (APC-labeled mouse anti-human antibodies (cat# 301808, BioLegend Inc, San Diego, CA, USA); dot plot (C) total lymphocytes subset was identified as CD45brightSSlow, while total granulocytes was CD45brightSShigh (PE-labeled mouse anti-human CD45 antibody was manufactured by BioLegend Inc, San Diego, CA, USA, cat# 304008) (Note: the relative numbers of monocytes were 0.8% (0.5; 1.5) within alive PBMCs, the relative number of granulocytes were 3.8% (3.0; 5.0), while the relative numbers of lymphocytes were 94.5% (93.0; 95.0),  $n = 8$ , the group median and quartile ranges (Med (Q25; Q75) are shown). Dot plot (D) total lymphocyte subset identification based on side scatter and forward scatter. Next, we analyzed the frequencies of CD3+ T-cells, CD19+ B-cells and CD3-CD56+ NK-cells on dot plots (E) and (F). We used APC/Cy7-labeled mouse anti-human CD3 antibodies (cat# 317342), PE/Cy7-labeled mouse anti-human CD19 antibodies (cat# 302216) and PerCP/Cyanine5.5-labeled mouse anti-human CD56 antibodies (cat# 362506), all antibodies were manufactured by BioLegend Inc, San Diego, CA, USA and used according manufactory recommendations. **Note:** within the total lymphocytes subset the frequency of CD3+ was 63.0% (58.0; 70.0), the frequency of CD19+ B-cells was 11.0% (10.0; 15.0), while the frequency of CD3-CD56+ NK-cells was 20.5% (14.0; 30.0) ( $n = 8$ , the group median and quartile ranges (Med (Q25; Q75) are shown). Sample acquisition was performed using a 3/10 Navios flow cytometer (Beckman Coulter, Indianapolis, IN, USA). The flow cytometry data were analyzed using Kaluza software v2.3 (Beckman Coulter, Indianapolis, IN, USA).

**Table S1.** Time-dependent arginine concentration in cell culture supernatants after exposure to parental and mutant strain-derived SDSC.

| Arginine supplement | Incubation duration. (hours) | L-arginine concentration (μM, Med [Q25;Q75], n=8) in the medium after PBMCs incubation in the presence |                              |                                  | L-arginine concentration (μM, Med [Q25;Q75], n=8) in the medium after PBMCs stimulation in the presence |                              |                                 |
|---------------------|------------------------------|--------------------------------------------------------------------------------------------------------|------------------------------|----------------------------------|---------------------------------------------------------------------------------------------------------|------------------------------|---------------------------------|
|                     |                              | Culture medium (control)                                                                               | M49-16                       | M49-16 delArcA                   | Culture medium (control)                                                                                | M49-16                       | M49-16 delArcA                  |
| 0 μM                | 24                           | 805.3<br>[737.2;831.0]                                                                                 | 132.3<br>[52.9;139.0]<br>ΔΔ  | 765.6<br>[684.3;790.0]<br>††     | 875.2<br>[790.2;888.0]                                                                                  | 138.0<br>[3.8;189.0]<br>&&   | 865.8<br>[722.1;994.0]<br>••    |
|                     | 48                           | 609.1<br>[537.2;664.9]                                                                                 | 175.3<br>[136.3;208.7]<br>Δ  | 657.2<br>[643.0;733.9]<br>†      | 590.6<br>[547.7;683.0]                                                                                  | 104.9<br>[63.9;188.7]<br>&&  | 520.2 [495.9; 597.3] ••         |
|                     | 72                           | 814.5<br>[741.5;879.5]                                                                                 | 244.0<br>[215.5;320.5]<br>ΔΔ | 705.0<br>[642.5;748.0]<br>††     | 766.5<br>[715.5;877.5]                                                                                  | 337.0<br>[294.5;364.5]<br>&& | 724.5<br>[618.5;828.5]<br>••    |
|                     | 96                           | 1015.2<br>[978.5;1057.0]                                                                               | 243.9<br>[236;325.0]<br>ΔΔ   | 852.9<br>[580.7;876]<br>†        | 905.3<br>[763.1;1076.0]                                                                                 | 261.8<br>[215.9;320.0]<br>&& | 929.0<br>[902.4;1003.0]<br>••   |
| 2 μM                | 24                           | 1638.9<br>[1595.5;1716.0]<br>ΔΔ                                                                        | 187.1<br>[124.8;820.0]       | 1833.6<br>[1795.8;1897.0]<br>§§  | 2020.8<br>[1890.3;2071.0]<br>&&                                                                         | 179.6<br>[136.1;283.0]       | 1763.7<br>[1640.8;1871.0]<br>□□ |
|                     | 48                           | 1278.2<br>[1121.8;1425.0]<br>ΔΔ                                                                        | 124.9<br>[116.3;135.3]       | 1531.5<br>[1494.4;1662.0]<br>§   | 1399.6<br>[1303.9;2024.9]<br>&&                                                                         | 136.3<br>[112.5;152.5]       | 1188.7<br>[969.6;1762.0]<br>□□  |
|                     | 72                           | 1638.5 ΔΔ<br>[1575;1699.5]                                                                             | 291.0<br>[170.5;395.5]       | 1518.5<br>[1220.5;1671.0]<br>§§§ | 1725.0<br>[1519.5;1782.5]<br>&&                                                                         | 310.5<br>[266.5;359.5]       | 1808.5<br>[1578.5;1890.5]<br>□□ |
|                     | 96                           | 2126.8<br>[2074.4;2195.0]<br>ΔΔ                                                                        | 631.7<br>[570.6;715.0]<br>†  | 2141.0<br>[1679.0;2266.0]<br>§§  | 1385.0<br>[1107.8;2106.0]<br>&                                                                          | 452.1<br>[312.1;777.0]       | 1652.2<br>[1498.5;1959.0]<br>□□ |

**Comments.** Digital 1, 2, 3 denote significance value at p<0.05, p<0.01, p<0.001, respectively.

Δ significant difference compared to control, without stimulation, in arginine-free settings;

† significant difference compared to M49-16, without stimulation, in arginine-free settings;

§ significant difference compared to M49-16delArcA, without stimulation, in arginine-free settings;

& significant difference compared to control with stimulation in arginine-free settings;

• significant difference compared to M49-16, with stimulation, in arginine-free settings;

□ significant difference compared to M49-16delArcA with stimulation in arginine-free settings.

**Table S2.** Time-dependent PBMC activation after exposure to parental and mutant strain-derived SDSC.

| Arginine supplement | Incubation duration. (hours) | Activation PBMCs (% , Med [Q25;Q75], n=9) after incubation in the presence |                                                |                                                    | Activation PBMC (% , Med [Q25;Q75], n=9) after stimulation in the presence |                               |                                   |
|---------------------|------------------------------|----------------------------------------------------------------------------|------------------------------------------------|----------------------------------------------------|----------------------------------------------------------------------------|-------------------------------|-----------------------------------|
|                     |                              | Culture medium (control)                                                   | M49-16                                         | M49-16 delArcA                                     | Culture medium (control)                                                   | M49-16                        | M49-16 delArcA                    |
| 0 $\mu$ M           | 24                           | 100.0<br>[100.0;100.0]                                                     | 99.7<br>[95.6;110.6]                           | 109.6<br>[100.2;115.7]<br>$\Delta$                 | 114.5<br>[108.0;115.6]<br>$\Delta\Delta\Delta$                             | 110.1<br>[95.1;111.0]         | 116.2<br>[110.7;122.5]            |
|                     | 48                           | 100.0<br>[100.0;100.0]                                                     | 105.3<br>[100.6;106.5]                         | 114.2<br>[110.0;121.7]<br>$\Delta\Delta\Delta$ †   | 195.0<br>[160.2;212.6]<br>$\Delta\Delta\Delta$                             | 108.1<br>[101.5;128.2]<br>&&& | 165.5<br>[160.0;183.5]<br>§ ●●●   |
|                     | 72                           | 100.0<br>[100.0;100.0]                                                     | 102.7<br>[92.7;106.3]                          | 143.2<br>[139.7;147.6]<br>$\Delta\Delta\Delta$ ††† | 229.1<br>[208;346.2]<br>$\Delta\Delta\Delta$                               | 101.1<br>[100.3;124.2]<br>&&& | 222.0<br>[216.2;254.3]<br>§§§ ●●● |
|                     | 96                           | 100.0<br>[100.0;100.0]                                                     | 124.1<br>[109.0;130.7]<br>$\Delta\Delta\Delta$ | 245.5<br>[192.6;259.0]<br>$\Delta\Delta\Delta$ ††† | 308.6<br>[252.7;324.2]<br>$\Delta\Delta\Delta$                             | 114.3<br>[106.7;122.9]<br>&&& | 310.0<br>[262.4;319.5]<br>§ ●●●   |
| 2 $\mu$ M           | 24                           | 105.6<br>[100.3;110.6]                                                     | 97.8<br>[90.5;106.0]                           | 103.3<br>[95.3;105.8]                              | 115.3<br>[112.5;122.5]                                                     | 109.0<br>[106.9;112.1]        | 112.6<br>[111.5;115.3]            |
|                     | 48                           | 101.8<br>[99.6;111.0] $\Delta$                                             | 108.9<br>[103.5;116.1]                         | 112.8<br>[108.1;128.9]                             | 171.6<br>[160.0;195.6]                                                     | 136.4<br>[122.0;146.9]<br>●   | 163.0<br>[156.7;172.5]            |
|                     | 72                           | 96.9<br>[93.3;100.5] $\Delta$                                              | 112.8<br>[104.1;117.6]<br>†                    | 144.7<br>[133.9;151.6]                             | 248.4<br>[234.2;306.4]                                                     | 129.0<br>[113.5;141.6]<br>●   | 238.7<br>[226.4;287.9] □          |
|                     | 96                           | 105.4<br>[95.5;110.4]                                                      | 133.3<br>[115.4;135.1]<br>††                   | 240.1<br>[202.2;253.8]                             | 413.0<br>[276.1;448.7]                                                     | 145.8<br>[129.3;153.1]<br>●●  | 370.3<br>[276.5;382.6] □          |

**Comments.** Digitals 1, 2, 3 denote significance value at  $p<0.05$ ,  $p<0.01$ ,  $p<0.001$ , respectively.

$\Delta$  significant difference compared to control, without stimulation, in arginine-free settings;

† significant difference compared to M49-16, without stimulation, in arginine-free settings;

§ significant difference compared to M49-16delArcA, without stimulation, in arginine-free settings;

& significant difference compared to control with stimulation in arginine-free settings;

● significant difference compared to M49-16, with stimulation, in arginine-free settings;

□ significant difference compared to M49-16delArcA with stimulation in arginine-free settings.

**Table S3.** IL-2 concentration in cell culture supernatants after exposure to parental and mutant strain-derived SDSC.

| Arginine supplement | IL-2 concentration (pg/ml, Med [Q25;Q75], n=7) after 96 hours PBMCs incubation in the presence |                      |                      | IL-2 concentration (pg/ml, Med [Q25;Q75], n=7) after 96 hours PBMC stimulation and incubation in the presence |                         |                             |
|---------------------|------------------------------------------------------------------------------------------------|----------------------|----------------------|---------------------------------------------------------------------------------------------------------------|-------------------------|-----------------------------|
|                     | Culture medium (control)                                                                       | M49-16               | M49-16 delArcA       | Culture medium (control)                                                                                      | M49-16                  | M49-16 delArcA              |
| 0 $\mu$ M           | 1.53<br>[1.53; 1.53]                                                                           | 0.90<br>[0.68; 1.32] | 1.53<br>[0.90; 3.87] | 22.3<br>[14.3; 27;1] $\Delta$                                                                                 | 8.98<br>[6.00; 13.45] & | 17.70<br>[6.64; 23.66] $\S$ |
| 2 $\mu$ M           | 1.32<br>[0.89; 2.60]                                                                           | 1.53<br>[1.11; 2.17] | 2.60<br>[1.11; 2.81] | 16.21<br>[8.34 [21.53]                                                                                        | 13.87<br>[6.85; 18.77]  | 16.85<br>[11.75; 17.70]     |

**Comments.** Digital 1, 2, 3 denote significance value at  $p < 0.05$ ,  $p < 0.01$ ,  $p < 0.001$ , respectively.

$\Delta$  significant difference compared to control, without stimulation, in arginine-free settings;

$\S$  significant difference compared to M49-16delArcA, without stimulation, in arginine-free settings;

& significant difference compared to control with stimulation in arginine-free settings.

**Table S4.** Effects of parental and mutant strain-derived SDSC on CD8+ T cell differentiation (48-hour incubation).

| Arginine supplement | CD8+ Subsets | Proportion of cells (%; Med [Q25;Q75], n=13) after 48 hours PBMCs incubation in the presence |                     |                        | Proportion of cells (%; Med [Q25;Q75], n=13) after 48 hours PBMC stimulation in the presence |                          |                          |
|---------------------|--------------|----------------------------------------------------------------------------------------------|---------------------|------------------------|----------------------------------------------------------------------------------------------|--------------------------|--------------------------|
|                     |              | Culture medium (control)                                                                     | M49-16              | M49-16 delArcA         | Culture medium (control)                                                                     | M49-16                   | M49-16 delArcA           |
| 0 $\mu$ M           | Naïve        | 68.2<br>[64.6;70.9]                                                                          | 73.1<br>[63.6;76.2] | 74.9<br>[68.3;81.0]    | 56.0<br>[41.0;77.0]                                                                          | 63.5<br>[56.2;71.6]      | 51.1<br>[47.2;71.8]<br>§ |
|                     | CM           | 7.8<br>[6.0;13.1]                                                                            | 5.5<br>[4.1;11.2]   | 5.3<br>[4.2;9.7]       | 7.3<br>[3.7;8.9]                                                                             | 4.2<br>[3.6;8.2]         | 7.1<br>[5.1;10.0]        |
|                     | EM           | 12.5<br>[10.3;16.8]                                                                          | 9.7<br>[8.9;14.0]   | 7.2<br>[6.9;11.8]<br>Δ | 8.8<br>[6.3;15.8]                                                                            | 8.8<br>[7.5;15.7]        | 10.2<br>[8.6;16.3]       |
|                     | TEMRA        | 9.6<br>[9.1;15.8]                                                                            | 11.6<br>[8.7;15.9]  | 8.9<br>[8.3;15.4]      | 19.6<br>[11.3;26.3]<br>Δ                                                                     | 18.4<br>[16.4;24.4]<br>† | 24.5<br>[15.9;30.4] §§   |
| 2 $\mu$ M           | Naïve        | 67.4<br>[59.2;69.2]                                                                          | 72.9<br>[63.4;76.4] | 71.4<br>[66.2;78.5]    | 51.1<br>[46.5;68.8]                                                                          | 50.8<br>[45.9;54.2]      | 52.2<br>[41.9;69.5]      |
|                     | CM           | 7.6<br>[6.3;12.6]                                                                            | 5.4<br>[4.7;10.2]   | 5.5<br>[4.6;10.7]      | 6.8<br>[4.4;9.9]                                                                             | 6.0<br>[3.9;9.3]         | 6.3<br>[4.6;10.4]        |
|                     | EM           | 13.6<br>[11.4;17.2]                                                                          | 10.5<br>[8.0;15.0]  | 8.4<br>[7.5;13.4]      | 10.0<br>[8.0;18.4]                                                                           | 12.3<br>[10.3;20.8]      | 11.7<br>[9.1;15.3]       |
|                     | TEMRA        | 12.1<br>[9.5;16.1]                                                                           | 12.4<br>[8.2;14.1]  | 11.0<br>[8.8;15.2]     | 20.4<br>[14.1;32.1]                                                                          | 25.0<br>[19.6;29.4]      | 23.5<br>[14.3;31]        |

**Comments.** Digital 1, 2, 3 denote significance value at  $p<0.05$ ,  $p<0.01$ ,  $p<0.001$ , respectively.

Δ significant difference compared to control, without stimulation, in arginine-free settings;

† significant difference compared to M49-16, without stimulation, in arginine-free settings;

§ significant difference compared to M49-16delArcA, without stimulation, in arginine-free settings;

& significant difference compared to control with stimulation in arginine-free settings;

• significant difference compared to M49-16, with stimulation, in arginine-free settings.

**Table S5.** Effects of parental and mutant strain-derived SDSC on CD8+ T cell differentiation (96-hour incubation).

| Arginine supplement | CD8+ Subsets | Proportion of cells (%; Med [Q25; Q75], n=13) after 96-hour PBMC incubation in the presence |                               |                     | Proportion of cells (%; Med [Q25; Q75], n=13) after 96-hour PBMC stimulation in the presence |                               |                              |
|---------------------|--------------|---------------------------------------------------------------------------------------------|-------------------------------|---------------------|----------------------------------------------------------------------------------------------|-------------------------------|------------------------------|
|                     |              | Culture medium (control)                                                                    | M49-16                        | M49-16 delArcA      | Culture medium (control)                                                                     | M49-16                        | M49-16 delArcA               |
| 0 $\mu$ M           | Naïve        | 55.7<br>[41.7;66.7]                                                                         | 59.7<br>[51.2;69.3]           | 57.7<br>[45.1;68.8] | 30.3<br>[22.5;51.5]<br>$\Delta\Delta$                                                        | 49.2<br>[42.3;60.6]<br>† &    | 30.4<br>[22.4;51.9]<br>§§ •  |
|                     | CM           | 11.2<br>[8.7;18.5]                                                                          | 8.6<br>[7.1;12.8]<br>$\Delta$ | 9.9<br>[7.1;14.0]   | 34.5<br>[28.3;46.2]<br>$\Delta\Delta\Delta$                                                  | 9.3<br>[5.8;14.0]<br>&&&      | 40.9<br>[30;48.2]<br>§§§ ••• |
|                     | EM           | 18.5<br>[11.5;20.4]                                                                         | 16.4<br>[8.6;21.2]            | 13.5<br>[9.7;18.4]  | 20.3<br>[10.1;27.8]                                                                          | 17.9<br>[11.8;22.8]           | 15.8<br>[12.3;24.0]          |
|                     | TEMRA        | 9.8<br>[6.1;16.7]                                                                           | 12.3<br>[9.2;17.1]            | 14.4<br>[7.9;18.6]  | 5.1<br>[3.8;8.7]<br>$\Delta$                                                                 | 21.2<br>[14.7;30.3]<br>†† &&& | 4.7<br>[3.1;7.6]<br>§§§ •••  |
| 2 $\mu$ M           | Naïve        | 59.2<br>[49.4;68.3]                                                                         | 60.9<br>[49.9;70.7]           | 57.0<br>[44.5;68.5] | 30.9<br>[16.2;46.8]                                                                          | 37.5<br>[16.7;49.1] •         | 34.2<br>[12.0;52.1]          |
|                     | CM           | 10.2<br>[9.0;14.7]                                                                          | 10.2<br>[5.9;14.6]            | 10.8<br>[8.0;16.2]  | 44.6<br>[32.4;51.5]                                                                          | 28.3<br>[10.5;39.2]<br>••     | 42.4<br>[29.1;60.7]          |
|                     | EM           | 15.4<br>[12.5;22.4]                                                                         | 14.6<br>[10.6;19.5]           | 14.7<br>[12.0;18.2] | 15.1<br>[9.9;24.4]                                                                           | 18.9<br>[15.5;27.8]           | 13.0<br>[8.5;24.7]           |
|                     | TEMRA        | 9.8<br>[7.1;16.9]                                                                           | 11.0<br>[8.4;17.9]            | 11.4<br>[8.8;14.1]  | 3.8<br>[2.7;6.2]                                                                             | 12.1<br>[4.2;22.7] •          | 3.4<br>[2.6;7.3]             |

**Comments.** Digitals 1, 2, 3 denote significance value at  $p<0.05$ ,  $p<0.01$ ,  $p<0.001$ , respectively.

$\Delta$  significant difference compared to control, without stimulation, in arginine-free settings;

† significant difference compared to M49-16, without stimulation, in arginine-free settings;

§ significant difference compared to M49-16delArcA, without stimulation, in arginine-free settings;

& significant difference compared to control with stimulation in arginine-free settings;

• significant difference compared to M49-16, with stimulation, in arginine-free settings.

**Table S6.** Effects of parental and mutant strain-derived SDSC on CD4+ T cell differentiation (48-hour incubation).

| Arginine supplement | CD4+ Subsets | Proportion of cells (%; Med [Q25;Q75], n=13) after 48hours PBMCs incubation in the presence |                     |                                       | Proportion of cells (%; Med [Q25;Q75], n=13) after 48 hours PBMC stimulation in the presence |                              |                            |
|---------------------|--------------|---------------------------------------------------------------------------------------------|---------------------|---------------------------------------|----------------------------------------------------------------------------------------------|------------------------------|----------------------------|
|                     |              | Culture medium (control)                                                                    | M49-16              | M49-16 delArcA                        | Culture medium (control)                                                                     | M49-16                       | M49-16 delArcA             |
| 0 $\mu$ M           | Naïve        | 56.1<br>[47.3;58.2]                                                                         | 58.4<br>[54.1;65.2] | 66.1<br>[59.5;70.4]<br>$\Delta\Delta$ | 53.9<br>[47.2;66.4]                                                                          | 68.4<br>[65.6;77.1]<br>† &&& | 55.2<br>[47.5;63.7]<br>••• |
|                     | CM           | 33.3<br>[27.4;46.7]                                                                         | 27.7<br>[24.9;41.5] | 25.6<br>[23.0;37.5]                   | 25.9<br>[18.8;41.1]                                                                          | 23.5<br>[19.9;32.1]<br>†     | 26.3<br>[22;43.7]          |
|                     | EM           | 11.0<br>[8.9;11.5]                                                                          | 9.0<br>[6.4;10.3]   | 6.5<br>[4.6;9.6]<br>$\Delta\Delta$    | 6.8<br>[5.3;14.7]                                                                            | 4.1<br>[2.8;7.7]<br>&&       | 10.0<br>[7;14.4]<br>••     |
|                     | TEMRA        | 0.7<br>[0.5;1.3]                                                                            | 0.8<br>[0.4;1.4]    | 0.5<br>[0.3;0.6]                      | 2.0<br>[1.5;2.5]<br>$\Delta\Delta\Delta$                                                     | 1.8<br>[1.4;2.3]<br>†        | 2.6<br>[1.8;6.3]<br>§§§    |
| 2 $\mu$ M           | Naïve        | 55.0<br>[49.1;56.7]                                                                         | 60.7<br>[57.3;66.8] | 61.7<br>[54.8;68.0]                   | 55.7<br>[42.3;59.5]                                                                          | 52.0<br>[42.2;58]<br>•       | 53.0<br>[37.1;60.0]        |
|                     | CM           | 32.5<br>[29.6;44.0]                                                                         | 28.8<br>[25;38.7]   | 27.7<br>[25.9;41.3]                   | 31.2<br>[21.2;45.3]                                                                          | 27.1<br>[22.6;40.8]          | 28.5<br>[21.8;44.8]        |
|                     | EM           | 10.7<br>[9.1;11.9]                                                                          | 7.4<br>[5.6;9.8]    | 6.3<br>[4.4;10.1]                     | 9.6<br>[6.2;14.1]                                                                            | 11.5<br>[7.9;15.6]<br>•••    | 8.5<br>[6.7;15.0]          |
|                     | TEMRA        | 0.6<br>[0.5;1.2]                                                                            | 0.7<br>[0.4;1.1]    | 0.5<br>[0.2;0.6]                      | 2.5<br>[1.9;4.9]                                                                             | 4.6<br>[2.2;7.3]<br>•        | 3.0<br>[1.5;6.3]           |

**Comments.** Digital 1, 2, 3 denote significance value at  $p < 0.05$ ,  $p < 0.01$ ,  $p < 0.001$ , respectively.

$\Delta$  significant difference compared to control, without stimulation, in arginine-free settings;

† significant difference compared to M49-16, without stimulation, in arginine-free settings;

§ significant difference compared to M49-16delArcA, without stimulation, in arginine-free settings;

& significant difference compared to control with stimulation in arginine-free settings;

• significant difference compared to M49-16, with stimulation, in arginine-free settings.

**Table S7.** Effects of parental and mutant strain-derived SDSC on CD4+ T cell differentiation (96-hour incubation).

| Arginine supplement | CD4+ Subsets | Proportion of cells (%; Med [Q25;Q75], n=13) after 96-hour PBMCs incubation in the presence |                              |                     | Proportion of cells (%; Med [Q25;Q75], n=13) after 96-hour PBMC stimulation in the presence |                             |                                |
|---------------------|--------------|---------------------------------------------------------------------------------------------|------------------------------|---------------------|---------------------------------------------------------------------------------------------|-----------------------------|--------------------------------|
|                     |              | Culture medium (control)                                                                    | M49-16                       | M49-16 delArcA      | Culture medium (control)                                                                    | M49-16                      | M49-16 delArcA                 |
| 0 $\mu$ M           | Naïve        | 43.1<br>[37.1;49.3]                                                                         | 40.7<br>[36.8;54.4]          | 44.3<br>[39.5;50.9] | 16.0<br>[8.7;20.4]<br>$\Delta\Delta\Delta$                                                  | 39.8<br>[33.3;50.6]<br>&&&  | 16.0<br>[9.2;18.6]<br>§§§ ●●●  |
|                     | CM           | 45.3<br>[36.5;48.9]                                                                         | 43.5<br>[32.2;47.9]          | 43.8<br>[36.4;52.3] | 66.5<br>[54.2;71.2]<br>$\Delta\Delta\Delta$                                                 | 44.4<br>[32.9;46.9]<br>&&&  | 68.9<br>[60.9;75.1]<br>§§§ ●●● |
|                     | EM           | 12.3<br>[9.3;15.2]                                                                          | 11.9<br>[9.1;14.1]           | 10.5<br>[8.2;12.7]  | 14.1<br>[9.2;24.8]                                                                          | 12.3<br>[8.9;17.2]          | 11.3<br>[9.1;21]               |
|                     | TEMRA        | 0.8<br>[0.4;1.0]                                                                            | 1.4<br>[0.9;1.9]             | 0.8<br>[0.6;1.7]    | 1.2<br>[0.7;2.0]<br>$\Delta$                                                                | 3.4<br>[2.2;5.9]<br>††† &&& | 1.1<br>[0.6;1.9]<br>●●●        |
| 2 $\mu$ M           | Naïve        | 43.5<br>[39.0;52.0]                                                                         | 44.0<br>[38.3;52.4]          | 42.2<br>[38.2;49]   | 12.0<br>[7.8;19.4]                                                                          | 22.7<br>[13.6;32.1]<br>●●●  | 10.3<br>[7.6;16.2]             |
|                     | CM           | 42.2<br>[36.4;50.7]                                                                         | 42.7<br>[37.2;47.9]          | 45.1<br>[37.5;49.2] | 72.5<br>[62.2;81.7]                                                                         | 56.8<br>[48.1;70.2]<br>●●●  | 73.3<br>[67.2;79.6]            |
|                     | EM           | 11.3<br>[8;14.7]                                                                            | 11.7<br>[8.0;13.2]           | 9.9<br>[8.5;13.1]   | 10.0<br>[6.5;18.1]                                                                          | 12.9<br>[10.0;18.5]         | 10.6<br>[6.1;18.2]             |
|                     | TEMRA        | 0.6<br>[0.4;1.0]                                                                            | 1.2<br>[0.8;2.3]<br>$\Delta$ | 0.8<br>[0.5;1.8]    | 0.6<br>[0.3;1.0]<br>&                                                                       | 2.0<br>[0.9;3.5] ●●●        | 0.6<br>[0.5;0.9]               |

**Comments.** Digital 1, 2, 3 denote significance value at  $p < 0.05$ ,  $p < 0.01$ ,  $p < 0.001$ , respectively.

$\Delta$  significant difference compared to control, without stimulation, in arginine-free settings;

§ significant difference compared to M49-16delArcA, without stimulation, in arginine-free settings;

& significant difference compared to control with stimulation in arginine-free settings;

• significant difference compared to M49-16, with stimulation, in arginine-free settings.



**Table S8.** Effects of parental and mutant strain-derived SDSC on CD8+ T cell proliferation (96-hour incubation).

| Arginine supplement | CD8+ Subsets | Division index (% Med [Q25; Q75], n=28) after PBMCs incubation in the presence |                   |                   | Division index (% Med [Q25; Q75], n=28) after PBMC stimulation and incubation in the presence |                           |                              |
|---------------------|--------------|--------------------------------------------------------------------------------|-------------------|-------------------|-----------------------------------------------------------------------------------------------|---------------------------|------------------------------|
|                     |              | Culture medium (control)                                                       | M49-16            | M49-16 delArcA    | Culture medium (control)                                                                      | M49-16                    | M49-16 delArcA               |
| 0 $\mu$ M           | Naïve        | 2.4<br>[2.1; 4.0]                                                              | 4.0<br>[2.8; 4.2] | 2.2<br>[2.2; 3.6] | 9.1<br>[4.3; 11.5]<br>$\Delta$                                                                | 2.1<br>[2.1; 3.6]<br>† && | 5.2<br>[3.4; 7.3]<br>§ ●●    |
|                     | CM           | 2.9<br>[2.0; 4.0]                                                              | 2.3<br>[2.1; 2.5] | 2.8<br>[2.0; 5.5] | 12.1<br>[7.7; 16.3]<br>$\Delta$                                                               | 1.0<br>[0.0; 2.4]<br>&&   | 15.3<br>[8.6; 18.9]<br>§§ ●● |
|                     | EM           | 2.2<br>[2.0; 7.5]                                                              | 2.0<br>[2.0; 2.1] | 2.3<br>[2.0; 5.5] | 9.7<br>[8.3; 15.5]<br>$\Delta$                                                                | 2.0<br>[2.0; 2.17]<br>&&  | 12.2<br>[9.1; 18.6]<br>§ ●●● |
|                     | TEMRA        | 2.0<br>[0.5; 3.5]                                                              | 2.0<br>[0.0; 2.1] | 2.0<br>[0.5; 2.7] | 8.5<br>[4.4; 13.4]<br>$\Delta$                                                                | 1.0<br>[0.0; 2.0]<br>&&&  | 5.9<br>[5.1; 7.2]<br>§§ ●●   |
| 2 $\mu$ M           | Naïve        | 3.0<br>[2.1; 4.1]                                                              | 3.9<br>[2.3; 4.1] | 2.3<br>[2.1; 4.0] | 3.8<br>[2.9; 6.9]<br>&                                                                        | 3.0<br>[2.1; 4.4]         | 4.4<br>[3.6; 6.3]            |
|                     | CM           | 2.1<br>[2.0; 2.9]                                                              | 2.8<br>[2.0; 4.4] | 2.5<br>[2.1; 9.8] | 12.5<br>[7.2; 18.0]                                                                           | 3.8<br>[2.4; 11.1]<br>●●  | 9.8<br>[5.38; 11.1]          |
|                     | EM           | 2.0<br>[2.0; 2.1]                                                              | 2.0<br>[2.0; 4.3] | 2.3<br>[2.0; 4.2] | 11.8<br>[7.6; 13.2]                                                                           | 4.2<br>[3.2; 10.1]<br>●●● | 11.4<br>[7.5; 15.0]          |
|                     | TEMRA        | 2.0<br>[0.0; 2.1]                                                              | 2.0<br>[0.5; 2.2] | 2.0<br>[2.0; 2.3] | 4.65<br>[3.0; 6.0]<br>&                                                                       | 3.3<br>[2.0; 6.5]<br>●    | 3.8<br>[2.7; 5.3]<br>□       |

**Comments.** Digitals 1, 2, 3 denote significance value at  $p < 0.05$ ,  $p < 0.01$ ,  $p < 0.001$ , respectively.

$\Delta$  significant difference compared to control, without stimulation, in arginine-free settings;

§ significant difference compared to M49-16delArcA, without stimulation, in arginine-free settings;

& significant difference compared to control with stimulation in arginine-free settings;

● significant difference compared to M49-16, with stimulation, in arginine-free settings;

□ significant difference compared to M49-16delArcA with stimulation in arginine-free settings.

**Table S9.** Effects of parental and mutant strain-derived SDSC on CD4+ T cell proliferation (96 hour incubation).

| Arginine supplement | CD4+ Subsets | Division index (% Med [Q25;Q75], n=28) after PBMCs incubation in the presence |                   |                   | Division index (% Med [Q25;Q75], n=28) after PBMC stimulation and incubation in the presence |                          |                              |
|---------------------|--------------|-------------------------------------------------------------------------------|-------------------|-------------------|----------------------------------------------------------------------------------------------|--------------------------|------------------------------|
|                     |              | Culture medium (control)                                                      | M49-16            | M49-16 delArcA    | Culture medium (control)                                                                     | M49-16                   | M49-16 delArcA               |
| 0 $\mu$ M           | Naïve        | 4.1<br>[3.8; 4.4]                                                             | 3.7<br>[3.6; 4.0] | 4.1<br>[3.7; 4.6] | 4.4<br>[3.6; 6.5]                                                                            | 3.9<br>[2.5; 4.0]        | 3.7<br>[2.7; 6.1]            |
|                     | CM           | 3.9<br>[2.2; 4.1]                                                             | 3.9<br>[2.1; 4.0] | 3.1<br>[2.1; 4.2] | 8.1<br>[7.1; 9.7]<br>$\Delta\Delta\Delta$                                                    | 2.1<br>[2.0; 4.0]<br>&&& | 7.3<br>[6.8; 9.3]<br>§§§ ●●● |
|                     | EM           | 2.2<br>[2.0; 4.4]                                                             | 2.0<br>[2.0; 2.9] | 3.1<br>[2.0; 6.2] | 8.9<br>[8.3; 10.78]<br>$\Delta\Delta\Delta$                                                  | 2.1<br>[2.0; 2.3]<br>&&& | 9.7<br>[8.2; 14.9]<br>§§ ●●● |
|                     | TEMRA        | 2.0<br>[0.5; 4.9]                                                             | 2.3<br>[2.0; 4.0] | 2.5<br>[2.1; 3.9] | 4.7<br>[3.9; 7.9]<br>$\Delta$                                                                | 2.1<br>[2.0; 2.1]<br>&&& | 4.3<br>[3.7; 7.1]<br>§ ●●●   |
| 2 $\mu$ M           | Naïve        | 4.0<br>[3.7; 4.2]                                                             | 4.0<br>[3.9; 4.5] | 4.0<br>[3.7; 4.3] | 4.2<br>[2.8; 5.0]                                                                            | 3.4<br>[2.7; 4.2]        | 3.6<br>[2.9; 5.0]            |
|                     | CM           | 3.9<br>[2.4; 4.2]                                                             | 2.9<br>[2.1; 3.9] | 2.9<br>[2.1; 4.0] | 8.8<br>[5.7; 11.0]                                                                           | 5.3<br>[2.4; 9.0]<br>●   | 11.1<br>[8.2; 13.2]<br>□     |
|                     | EM           | 2.2<br>[2.0; 2.5]                                                             | 2.2<br>[2.0; 3.0] | 3.3<br>[2.1; 4.3] | 7.1<br>[5.9; 10.0]                                                                           | 6.5<br>[4.2; 9.5]<br>●●● | 7.8<br>[5.4; 8.8]<br>□       |
|                     | TEMRA        | 2.2<br>[2.0; 2.8]                                                             | 2.2<br>[2.1; 2.6] | 2.7<br>[2.2; 3.7] | 3.8<br>[3.2; 6.15]                                                                           | 3.3<br>[2.7; 3.6]<br>●●● | 3.6<br>[2.9; 5.0]            |

**Comments.** Digital 1, 2, 3 denote significance value at  $p < 0.05$ ,  $p < 0.01$ ,  $p < 0.001$ , respectively.

$\Delta$  significant difference compared to control, without stimulation, in arginine-free settings;

§ significant difference compared to M49-16delArcA, without stimulation, in arginine-free settings;

& significant difference compared to control with stimulation in arginine-free settings;

● significant difference compared to M49-16, with stimulation, in arginine-free settings;

□ significant difference compared to M49-16delArcA with stimulation in arginine-free settings.

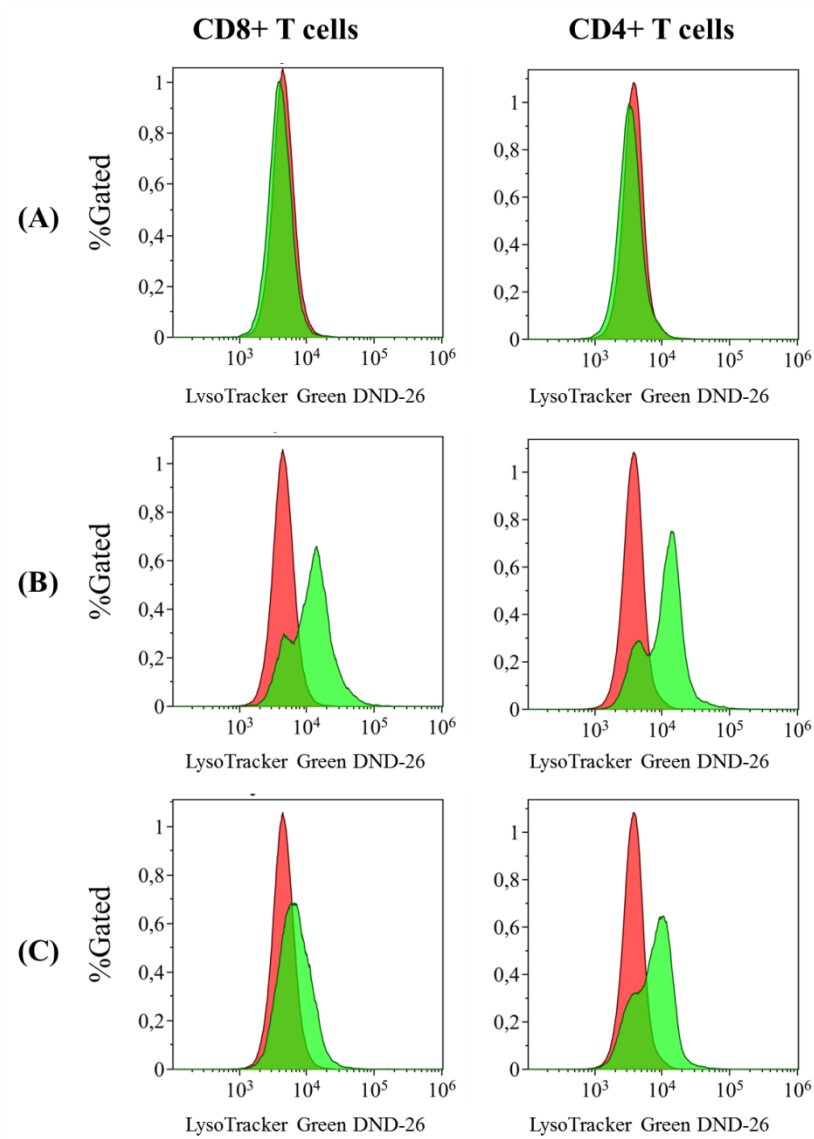

**Figure S2.** Effects of chloroquine (CQ) on anti-CD2/CD3/CD28-induced T cell autophagy. Representative histograms reflecting changes in the autophagy level (A) Ctrl (Red), 10  $\mu$ M CQ treatment (Green); (B) Ctrl (Red), anti-CD2/CD3/CD28 treatment (Green) (C) Ctrl (Red), anti-CD2/CD3/CD28 + CQ 10  $\mu$ M treatment (Green). PBMCs were activated with anti-CD2/CD3/CD28 loaded beads in the presence or absence of 10  $\mu$ M CQ for the last 20 h. After 48 hours cells were stained with antibody cocktail (see 2.6), samples were added with dye LysoTracker Green DND-26. To exclude necrotic cells from the analysis, the samples were stained with DAPI. Samples were analyzed by flow cytometry. The results were expressed as mean of fluorescence intensity (MFI).

**Table S10.** Effects of parental and mutant strain-derived SDSC on CD8+ T cell autophagy (48 hour incubation).

| Arginine supplement | CD8+ Subsets | Intensity of autophagy (MFI, Med [Q25;Q75], n=13) after 48 hours PBMCs incubation in the presence |                  |                  | Intensity of autophagy (MFI, Med [Q25;Q75], n=13) after 96 hours PBMC stimulation in the presence |                                      |                              |
|---------------------|--------------|---------------------------------------------------------------------------------------------------|------------------|------------------|---------------------------------------------------------------------------------------------------|--------------------------------------|------------------------------|
|                     |              | Culture medium (control)                                                                          | M49-16           | M49-16 delArcA   | Culture medium (control)                                                                          | M49-16                               | M49-16 delArcA               |
| 0 $\mu$ M           | Naïve        | 3.4<br>[3.1;3.8]                                                                                  | 3.4<br>[3.2;4.0] | 3.8<br>[3.5;4.2] | 5.8<br>[4.3;6.7]<br>$\Delta\Delta$                                                                | 5.1<br>[4.7;5.4]<br>$\dagger\dagger$ | 6.1<br>[4.7;9.3]<br>$\S\S$   |
|                     | CM           | 3.9<br>[2.6;4.3]                                                                                  | 3.6<br>[3.4;4.0] | 3.9<br>[3.2;4.3] | 6.2<br>[5.2;7.2]<br>$\Delta\Delta$                                                                | 4.9<br>[4.3;5.3]<br>&                | 6.9<br>[4.7;9.5]<br>$\S$     |
|                     | EM           | 3.6<br>[2.8;4.1]                                                                                  | 3.4<br>[3.1;4.4] | 3.9<br>[3.2;4.4] | 6.0<br>[5.2;7.4]<br>$\Delta\Delta$                                                                | 4.1<br>[3.7;5.4]<br>&                | 6.2<br>[4.9;8.1]<br>$\S\S$ & |
|                     | TEMRA        | 4.0<br>[3.2;5.4]                                                                                  | 3.8<br>[3.7;5.2] | 4.3<br>[3.8;5.7] | 6.1<br>[5.9;7.0]<br>$\Delta$                                                                      | 5.3<br>[4.7;6.0]                     | 6.3<br>[5.3;7.2]<br>$\S$     |
| 2 $\mu$ M           | Naïve        | 3.9<br>[3.6;4.1]                                                                                  | 3.9<br>[3.2;4.0] | 3.7<br>[3.5;4.3] | 6.3<br>[4.9;8.4]                                                                                  | 6.0<br>[4.8;6.9]                     | 6.3<br>[4.8;8.6]             |
|                     | CM           | 3.4<br>[3.1;4.2]                                                                                  | 4.0<br>[3.1;4.5] | 3.5<br>[3.2;4.2] | 6.8<br>[5.0;9.3]                                                                                  | 6.1<br>[5.4;8.0]<br>$\bullet$        | 6.8<br>[5.0;9.2]             |
|                     | EM           | 3.7<br>[3.3;3.9]                                                                                  | 4.0<br>[3.3;4.3] | 3.5<br>[3.1;3.9] | 6.4<br>[6.0;8.2]                                                                                  | 6.7<br>[6.3;8.7]<br>$\bullet\bullet$ | 6.7<br>[5.4;8.1]             |
|                     | TEMRA        | 4.3<br>[3.6;5.0]                                                                                  | 4.4<br>[4;5.3.0] | 4.1<br>[3.7;5.2] | 6.5<br>[5.8;7.4]                                                                                  | 7.4<br>[5.7;8.0]                     | 7.1<br>[5.4;7.3]             |

**Comments.** Digital 1, 2, 3 denote significance value at  $p<0.05$ ,  $p<0.01$ ,  $p<0.001$ , respectively.

$\Delta$  significant difference compared to control, without stimulation, in arginine-free settings;

$\dagger$  significant difference compared to M49-16, without stimulation, in arginine-free settings;

$\S$  significant difference compared to M49-16delArcA, without stimulation, in arginine-free settings;

& significant difference compared to control with stimulation in arginine-free settings;

$\bullet$  significant difference compared to M49-16, with stimulation, in arginine-free settings.

**Table S11.** Effects of parental and mutant strain-derived SDSC on CD8+ T cell autophagy (96-hour incubation).

| Arginine supplement | CD8+ Subsets | Intensity of autophagy (MFI, Med [Q25;Q75], n=13) after 96hours PBMCs incubation in the presence |                  |                  | Intensity of autophagy (MFI, Med [Q25;Q75], n=13) after 96-hour PBMC stimulation in the presence |                        |                         |
|---------------------|--------------|--------------------------------------------------------------------------------------------------|------------------|------------------|--------------------------------------------------------------------------------------------------|------------------------|-------------------------|
|                     |              | Culture medium (control)                                                                         | M49-16           | M49-16 delArcA   | Culture medium (control)                                                                         | M49-16                 | M49-16 delArcA          |
| 0 $\mu$ M           | Naïve        | 3.8<br>[3.1;4.2]                                                                                 | 3.9<br>[3.4;4.1] | 3.8<br>[3.3;4.5] | 7.2<br>[6.0;10.9]<br>$\Delta\Delta$                                                              | 4.8<br>[4.3;7.3]<br>++ | 7.8<br>[6.4;12.0]<br>§§ |
|                     | CM           | 3.2<br>[2.6;3.9]                                                                                 | 3.3<br>[2.7;4.2] | 3.2<br>[2.5;4.8] | 6.9<br>[5.6;11.2]<br>$\Delta\Delta$                                                              | 4.5<br>[3.5;8.4]       | 7.4<br>[6.1;11.7]<br>§§ |
|                     | EM           | 3.0<br>[2.6;3.5]                                                                                 | 3.4<br>[2.5;3.9] | 3.1<br>[2.6;4.4] | 6.7<br>[5.1;8.3]<br>$\Delta\Delta$                                                               | 5.1<br>[3.7;7.3]<br>+  | 7.2<br>[6.0;8.7]<br>§   |
|                     | TEMRA        | 3.4<br>[2.9;4.0]                                                                                 | 3.9<br>[3.1;4.8] | 3.5<br>[3.2;5.3] | 5.8<br>[4.9;7.4]<br>$\Delta$                                                                     | 5.5<br>[4.3;7.8]<br>+  | 6.3<br>[5.7;7.7]<br>§   |
| 2 $\mu$ M           | Naïve        | 3.5<br>[2.9;4.1]                                                                                 | 3.6<br>[3.2;4.4] | 3.7<br>[3.2;4.2] | 7.1<br>[6.0;11.5]                                                                                | 7.0<br>[6.0;10.3]      | 7.3<br>[6.1;11.1]       |
|                     | CM           | 2.6<br>[2.2;3.9]                                                                                 | 3.4<br>[2.5;5.4] | 3.2<br>[2.5;4.3] | 6.5<br>[5.8;12.0]                                                                                | 7.2<br>[6.5;12.1]      | 7.1<br>[5.7;11.4]       |
|                     | EM           | 2.4<br>[2.1;3.8]                                                                                 | 3.2<br>[2.4;5.6] | 3.0<br>[2.3;4.2] | 5.5<br>[4.9;9.6]                                                                                 | 6.8<br>[5.5;11.6]      | 5.6<br>[4.6;9.4]        |
|                     | TEMRA        | 2.9<br>[2.5;4.3]                                                                                 | 4.0<br>[3.1;5.8] | 4.0<br>[3.0;4.3] | 5.2<br>[5.0;6.8]                                                                                 | 6.1<br>[5.1;9.0]       | 4.7<br>[4.2;6.9]        |

**Comments.** Digital 1, 2, 3 denote significance value at  $p<0.05$ ,  $p<0.01$ ,  $p<0.001$ , respectively.

$\Delta$  significant difference compared to control, without stimulation, in arginine-free settings;

† significant difference compared to M49-16, without stimulation, in arginine-free settings;

§ significant difference compared to M49-16delArcA, without stimulation, in arginine-free settings.

**Table S12.** Effects of parental and mutant strain-derived SDSC on CD4+ T cell autophagy (48-hour incubation).

| Arginine supplement | CD4+ Subsets | Intensity of autophagy (MFI, Med [Q25;Q75], n=13) after 48 hours PBMCs incubation in the presence |                  |                  | Intensity of autophagy (MFI, Med [Q25;Q75], n=13) after 48 hours PBMC stimulation in the presence |                         |                           |
|---------------------|--------------|---------------------------------------------------------------------------------------------------|------------------|------------------|---------------------------------------------------------------------------------------------------|-------------------------|---------------------------|
|                     |              | Culture medium (control)                                                                          | M49-16           | M49-16 delArcA   | Culture medium (control)                                                                          | M49-16                  | M49-16 delArcA            |
| 0 $\mu$ M           | Naïve        | 2.9<br>[2.3;3.4]                                                                                  | 3.0<br>[2.6;3.2] | 2.9<br>[2.7;3.4] | 5.7<br>[4.2;6.3]<br>$\Delta\Delta$                                                                | 3.7<br>[3.5;4.8]<br>++  | 6.2<br>[4.3;7.4]<br>§§    |
|                     | CM           | 3.2<br>[2.8;3.7]                                                                                  | 3.2<br>[3.0;3.8] | 3.6<br>[3.3;4.1] | 5.9<br>[4.8;7.0]<br>$\Delta\Delta$                                                                | 4.0<br>[3.6;4.8]<br>+ & | 6.9<br>[4.4;8.4]<br>§ •   |
|                     | EM           | 3.2<br>[2.7;4.2]                                                                                  | 3.7<br>[3.3;3.9] | 4.1<br>[3.6;4.3] | 6.1<br>[5.9;9.6]<br>$\Delta\Delta$                                                                | 4.8<br>[3.6;5.2]<br>&&  | 7.4<br>[5.5;8.5]<br>§§ •• |
|                     | TEMRA        | 4.1<br>[3.3;4.9]                                                                                  | 3.7<br>[3.6;4.2] | 4.3<br>[3.8;4.9] | 7.9<br>[6.7;9.5]<br>$\Delta$                                                                      | 4.9<br>[3.4;5.9]<br>&   | 7.6<br>[6.3;8.2]<br>§§ •  |
| 2 $\mu$ M           | Naïve        | 3.1<br>[2.5;3.4]                                                                                  | 3.0<br>[2.9;3.4] | 3.2<br>[2.4;3.4] | 5.9<br>[4.3;7.8]                                                                                  | 5.9 [4.5;6.9]           | 6.3<br>[4.3;7.7]          |
|                     | CM           | 3.6<br>[2.9;3.9]                                                                                  | 3.7<br>[3.5;4.4] | 3.7<br>[3.2;3.9] | 6.5<br>[4.9;8.3]                                                                                  | 5.6 [5.5;7.3]<br>••     | 6.7<br>[4.7;8.4]          |
|                     | EM           | 3.5<br>[3.1;4.0]                                                                                  | 4.1<br>[3.8;5.5] | 3.8<br>[3.5;4.1] | 7.8<br>[6.8;8.7]                                                                                  | 7.4 [6.8;10.4]<br>••    | 8.1<br>[6.1;8.8]          |
|                     | TEMRA        | 4.0<br>[3.8;4.6]                                                                                  | 4.2<br>[3.6;5.0] | 4.0<br>[3.9;4.4] | 8.0<br>[6.9;9.2]                                                                                  | 8.2 § [7.9;9.8]<br>•    | 8.2<br>[7.9;9.0]          |

**Comments.** Digital 1, 2, 3 denote significance value at  $p < 0.05$ ,  $p < 0.01$ ,  $p < 0.001$ , respectively.

$\Delta$  significant difference compared to control, without stimulation, in arginine-free settings;

† significant difference compared to M49-16, without stimulation, in arginine-free settings;

§ significant difference compared to M49-16delArcA, without stimulation, in arginine-free settings;

& significant difference compared to control with stimulation in arginine-free settings;

• significant difference compared to M49-16, with stimulation, in arginine-free settings.

**Table S13.** Effects of parental and mutant strain-derived SDSC on CD4+ T cell autophagy (96-hour incubation).

| Arginine supplement | CD4+ Subsets | Intensity of autophagy (MFI, Med [Q25;Q75], n=13) after 96 hour PBMCs incubation in the presence |                  |                  | Intensity of autophagy (MFI, Med [Q25;Q75], n=13) after 96-hour PBMC stimulation in the presence |                   |                             |
|---------------------|--------------|--------------------------------------------------------------------------------------------------|------------------|------------------|--------------------------------------------------------------------------------------------------|-------------------|-----------------------------|
|                     |              | Culture medium (control)                                                                         | M49-16           | M49-16 delArcA   | Culture medium (control)                                                                         | M49-16            | M49-16 delArcA              |
| 0 $\mu$ M           | Naïve        | 3.0<br>[2.8;4.0]                                                                                 | 3.2<br>[2.6;3.8] | 3.0<br>[2.5;3.5] | 5.6<br>[4.3;6.9]<br>$\Delta\Delta$                                                               | 3.9<br>[3.1;5.1]  | 5.3<br>[5.0;7.5]<br>$\S\S$  |
|                     | CM           | 3.3<br>[2.9;3.8]                                                                                 | 3.4<br>[2.7;3.8] | 3.1<br>[2.6;4.5] | 6.3<br>[5.5;10.2]<br>$\Delta\Delta$                                                              | 3.7<br>[3.1;5.9]  | 7.2<br>[5.8;10.1]<br>$\S\S$ |
|                     | EM           | 2.8<br>[2.5;3.6]                                                                                 | 3.1<br>[2.6;4.0] | 2.9<br>[2.5;4.4] | 6.7<br>[5.6;9.0]<br>$\Delta\Delta$                                                               | 4.2<br>[3.3;6.1]  | 7.4<br>[5.6;8.7]<br>$\S\S$  |
|                     | TEMRA        | 3.3<br>[3.0;4.1]                                                                                 | 4.0<br>[3.5;4.7] | 4.1<br>[2.7;4.8] | 7.2<br>[5.8;8.1]<br>$\Delta$                                                                     | 5.6<br>[3.8;7.1]  | 6.7<br>[5.3;7.3]<br>$\S$    |
| 2 $\mu$ M           | Naïve        | 2.9<br>[2.5;3.3]                                                                                 | 3.1<br>[2.4;3.6] | 2.9<br>[2.3;3.4] | 5.4<br>[4.3;8.1]                                                                                 | 5.6<br>[4.3;7.9]  | 6.2<br>[3.9;7.4]            |
|                     | CM           | 2.7<br>[2.3;3.7]                                                                                 | 3.2<br>[2.3;5.0] | 3.0<br>[2.5;3.9] | 6.7<br>[5.5;10.9]                                                                                | 6.3<br>[5.5;10.6] | 7.5<br>[5.6;10.4]           |
|                     | EM           | 2.4<br>[2.1;3.8]                                                                                 | 3.4<br>[2.6;6.0] | 3.2<br>[2.4;4.1] | 6.0<br>[4.8;9.5]                                                                                 | 6.5<br>[5.3;10.5] | 5.9<br>[5;8.9]              |
|                     | TEMRA        | 3.2<br>[2.8;4.1]                                                                                 | 4.2<br>[3.4;5.8] | 4.1<br>[2.7;4.6] | 6.2<br>[4.5;8.0]                                                                                 | 6.4<br>[5.1;9.6]  | 5.6<br>[4.4;7]              |

**Comments.** Digitals 1, 2, 3 denote significance value at  $p<0.05$ ,  $p<0.01$ ,  $p<0.001$ , respectively.

$\Delta$  significant difference compared to control, without stimulation, in arginine-free settings;

$\S$  significant difference compared to M49-16delArcA, without stimulation, in arginine-free settings.
